# Supplementary figures and images for: Early-life behavioral features are associated with chronic emesis in rhesus macaques (Macaca mulatta)
Source: PubMed Central journal article supplement — Am J Primatol. Author manuscript; Available in PMC 2024 Jun 1. (PMC10231223; doi:10.1002/ajp.23488), 2023-03-28

Emesis Start Age (y)

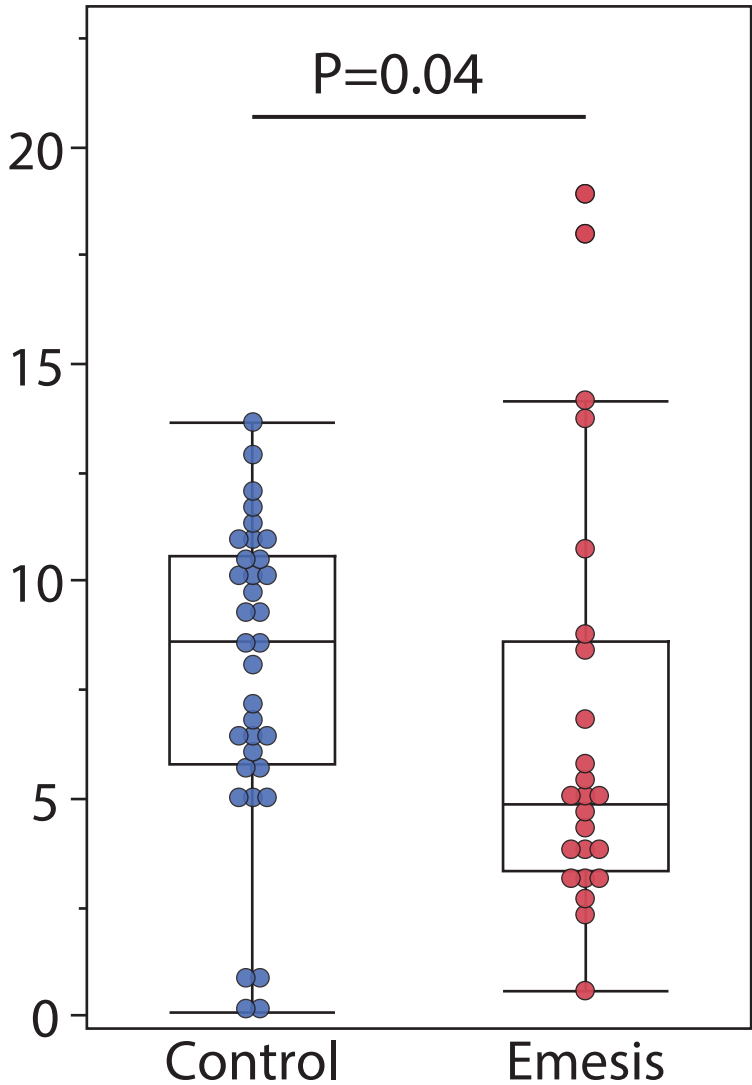

Supplement: NIHMS1886931-supplement-Figure_S1.pdf [file NIHMS1886931-supplement-Figure_S1.pdf]
